# Supplementary material for: Thrombin Aptamer-Modified Metal–Organic Framework Nanoparticles: Functional Nanostructures for Sensing Thrombin and the Triggered Controlled Release of Anti-Blood Clotting Drugs
Source: MDPI journal article supplement (doi:10.3390/s19235260), 2019-11-29
Supplement: s1 [file s1]

**Thrombin Aptamer-Modified Metal-Organic Framework Nanoparticles:  
Functional Nanostructures for Sensing Thrombin and the Triggered Controlled  
Release of Anti-Blood Clotting Drugs**

Wei-Hai Chen,<sup>1</sup> Ola Karmi,<sup>2</sup> Bilha Willner,<sup>1</sup> Rachel Nechushtai,<sup>2</sup> and Itamar

Willner<sup>1,\*</sup>

<sup>1</sup>Institute of Chemistry, Center for Nanoscience and Nanotechnology, The Hebrew University of Jerusalem, Jerusalem 91904, Israel

<sup>2</sup>Institute of Life Science, The Hebrew University of Jerusalem, Jerusalem 91904, Israel

\* To whom correspondence should be addressed. Tel: 972-2-6585272. Fax: 972-2-6527715.

E-mail: willnea@vms.huji.ac.il

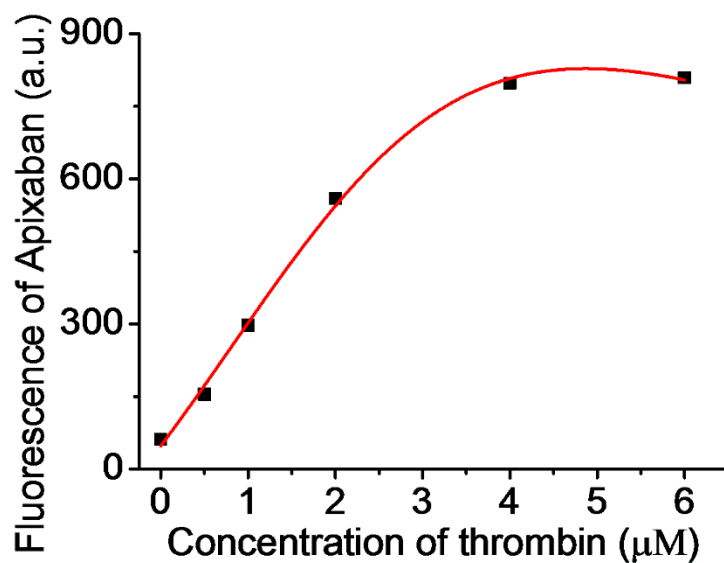

**Figure S1.** Fluorescence spectra of the released Apixaban from the drug-loaded NMOFs upon treatment with variable concentrations of thrombin for a fixed time-interval of 30 min. The release rate reaches a saturation value at a thrombin concentration that corresponds to 4  $\mu\text{M}$ , implying that at this concentration of thrombin all aptamer gating units are unlocked.

Table S1. Comparison of Apixaban-induced inhibition of clot formation.

| Method of detection                                                                                | Concentration of drug used to induce clot formation | Reference                                               |
|----------------------------------------------------------------------------------------------------|-----------------------------------------------------|---------------------------------------------------------|
| Monitoring of prothrombinase using fluorophore-labeled thrombin                                    | 200 nM <sup>a</sup>                                 | <i>TH Open</i> <b>2018</b> , 2, e190-e201.              |
| Probing time-dependent clot formation by light scattering, $\lambda = 405 \text{ nm}$ <sup>b</sup> | 440 nM<br>ca. 35 minutes to induce clot formation   | <i>J. Thromb. Haemost.</i> <b>2018</b> , 16, 2276-2288. |
| Clot waveform analysis used to activate partial thromboplastin                                     | 800 nM <sup>c</sup>                                 | <i>J. Clin. Pathol.</i> <b>2019</b> , 72, 244-250.      |
| Present study <sup>d</sup>                                                                         | 5.4 nM                                              |                                                         |

a. No systematic report on the concentrations of Apixaban-induced clot formation is provided.

b. Method follows the fibrinolysis by factor Xa.

c. Time of Apixaban-induced clot formation not stated.

d. Method described in the experimental section.
